# Supplementary material for: Fidelity of human ovarian cancer patient-derived xenografts in a partially humanized mouse model for preclinical testing of immunotherapies
Source: PubMed Central journal article supplement (PMC7661374; doi:10.1136/jitc-2020-001237), 2020-11-11
Supplement: jitc-2020-001237supp001.pdf [file jitc-2020-001237supp001.pdf]

## **SUPPLEMENTARY METHODS**

### **Preparing TILs and TALs, and expanding T cells**

Tumor-infiltrated leukocytes (TILs) and tumor-associated leukocytes (TALs) were freshly isolated from tumor tissues and/or ascites fluid, respectively. Solid tumor specimens were dissociated using gentleMACS Dissociator (Miltenyi). Mononuclear cells were enriched by density gradient using lymphocyte separation medium. The resulting TILs or TALs contain mixed viable immune cells and tumor cells. HLA2-A2 positivity of the TILs/TALs was determined using flow cytometry. Autologous PBMCs, TALs or TILs ( $1-2 \times 10^6$  cells) were seeded in a single well of a 6-well-plate and cultured in AIMV-1640 medium (50% AIM-V, Gibco; 50% RPMI1640; 5% human serum, Gemini Bio-products) and IL-2 (200 U/ml, PeproTech) supplemented with anti-CD3 (OKT3, 1  $\mu$ g/ml, Bio X Cell) and PHA (1  $\mu$ g/ml) for 3 days and then expanded for 12-16 days. Floating cells were collected every 3-days and frozen for later use. Cultures were replaced with new medium containing IL2, for 3-4 times.

### **Establishing PDXs, spheroids, cell lines and tumor measurement**

To establish PDXs, 50  $\mu$ l of minced tumor slurry was IP injected or mixed with 50  $\mu$ l of Matrigel (BD Bioscience) for SQ injection. Tumor formation were monitored weekly by measuring the abdominal circumference (IP) or using calipers (SQ). Mice were euthanized when the abdominal circumference of the IP tumor reached 9-10 cm and the SQ tumor reach 1500 mm<sup>3</sup>, using the reported formula ( $\text{length} \times \text{wide}^2/2$ ). Ascites, peritoneal wash and any visible tumor nodules in the peritoneal cavity from the IP mice were minced and 50  $\mu$ l of tumor slurry was used to passage the PDXs. In some experiments with treatment, tumor growth was monitored by bioluminescence using IVIS Spectrum (PerkinElmer). For generating spheroids, TILs or TALs were cultured in ultra-low attachment plates (Corning) supplemented with spheroid growth medium, that was composed of serum-free DMEM/F12, human recombinant epidermal growth factor (EGF, 10 ng/mL;

Invitrogen), basic fibroblast growth factor (bFGF, 10 ng/mL; Invitrogen), B-27 (Stemcell Technologies), leukemia inhibitory factor (LIF, 5 ng/ml, Sigma), and insulin (10 µg/ml, Sigma), for approximately 2-3 months as described previously [1]. To establish tumor cell lines (from TILs or TALs), cells were cultured in RPMI1640-complete medium which contains 10% fetal bovine serum, 100 U/mL penicillin, 100 µg/mL streptomycin, 2 mM Glutamate, 100 µM sodium pyruvate, 100 µM non-essential minimum amino acid, 20 mM HEPES, and 50 µM 2-mercaptoethanol. The culture was passaged when confluent until it could be passaged once every week (more than 30 generation). The resulting cell culture was deemed to be a cell line (PD-CL).

Both spheroid lines and cell lines were tested to be tumorigenic as they formed progressive SQ tumors (>1cm in diameter) or readily apparent peritoneal tumors/ascites in NSG mice around 2-month post tumor implantation (**figure S2**).

#### **Adoptive T cell transfer and checkpoint blockade antibody treatment**

For ACT, IL2-expanded autologous PBMCs or TALs or non-expanded TALs were IP injected into mice at day 14, or 34 (as indicated in the figures) following tumor implantation. Mice were treated with IL2 (2000 U) daily for three days and anti-human blocking antibodies anti-PD1 (200 µg/dose), anti-CTLA4 (100 µg/dose), both anti-PD-1/CTLA4, or control IgG (200 µg/dose) were administered together with IL2 (IP) every 2-3 days for 7 doses. IL2 was given once per week thereafter until mice reached experimental endpoint. All blocking antibodies were from Bio X Cell.

#### **RNA isolation and RNA-sequencing:**

RNA was prepared using Tri-Reagent (Sigma) and RNA cleanup kit (Norgen). RNA libraries (TruSeq RNA Library Prep kit, Illumina) were prepared and ran on the Illumina HiSeq 2500 by the RPCCC Genomic Share Resource. Sample reads were aligned to the human reference genome (GRCh38) and GENCODE (version 25) annotation database using TopHat2 [28]. Gene level raw counts were obtained using Subread package [2]. Differential gene expression analysis was

performed using DESeq2 [3] and pathway analysis was performed with the Gene Set Enrichment Analysis (GSEA) method (3.0) [4]. The pre-ranked tool was chosen to run the analysis using a ranked gene list obtained from specific statistical comparisons ran on DESeq2. Pathway analysis was run against MSigDB, a collection of annotated and curated gene set repositories offered by the developer of GSEA (Broad Institute MIT and Harvard). This particular run used C2 of version 7.0 collection, containing 1329 gene sets from various well-known and up-to-date pathway databases such as BioCarta, KEGG and Reactome among others.

**Supplementary Table 2:** Antibodies used for flow cytometry staining of tumor single cell suspensions.

| Antigen    | Antibody clone | Supplier    | Catalog number | Fluorophore  |
|------------|----------------|-------------|----------------|--------------|
| CD45       | H130           | BioLegend   | 304022         | Pacific Blue |
| CD3        | OKT3           | BioLegend   | 317307         | PE           |
| CD3        | HIT3a          | BioLegend   | 300313         | APC          |
| CD8a       | HIT8a          | BioLegend   | 300920         | AF700        |
| CD4        | OKT4           | BioLegend   | 317408         | FITC         |
| PD-1       | EH12.2H7       | BioLegend   | 329920         | BV421        |
| TIM3       | F38-2E2        | BioLegend   | 345011         | APC          |
| LAG3       | 11C3C65        | BioLegend   | 369306         | PE           |
| LAG3       | 17B4           | R&D Systems | FBA2319P       | PE           |
| 4-1BB      | 4B4-1          | BioLegend   | 309804         | PE           |
| TIGIT      | A15153G        | BioLegend   | 372705         | APC          |
| CD25       | HI30           | BioLegend   | 304012         | APC          |
| FoxP3      | 236A1E7        | eBioscience | 124777-42      | PE           |
| PD-L1      | 29E2A3         | BioLegend   | 329705         | PE           |
| CD48       | BI40           | BioLegend   | 336706         | FITC         |
| CD80       | 2D10           | BioLegend   | 305221         | BV421        |
| CD86       | IT2.2          | BioLegend   | 305421         | PE/Cy7       |
| HVEM       | 122            | BioLegend   | 318807         | APC          |
| Galectin 3 | M3/38          | BioLegend   | 125410         | AF488        |
| Galectin 9 | 9MI-3          | BioLegend   | 348905         | PE           |
| EpCAM      | 9C4            | BioLegend   | 324220         | BV421        |
| E-Cadherin |                | BioLegend   |                |              |

|                                 |        |                             |        |        |
|---------------------------------|--------|-----------------------------|--------|--------|
| HLA-DR                          | L234   | BioLegend                   | 307643 | BV-711 |
| CD33                            | P67.6  | BioLegend                   | 366607 | PE     |
| CD11b                           | 1CRF44 | BioLegend                   | 301329 | FITC   |
| CD15                            | HI98   | BioLegend                   | 301907 | APC    |
| CD14                            | 63O3   | BioLegend                   | 367111 | PE/Cy7 |
| CD56                            | 5.1H11 | BioLegend                   | 362537 | BV-605 |
| LIVE/DEAD<br>fixable<br>Near-IR |        | Thermo Fisher<br>Scientific | L34975 |        |

1. Liao J, Qian F, Tchabo N, Mhaweche-Fauceglia P, Beck A, Qian Z, et al. Ovarian cancer spheroid cells with stem cell-like properties contribute to tumor generation, metastasis and chemotherapy resistance through hypoxia-resistant metabolism. *PLoS One*. 2014;9(1):e84941. doi: 10.1371/journal.pone.0084941. PubMed PMID: 24409314; PubMed Central PMCID: PMC3883678.
2. Liao Y, Smyth GK, Shi W. The Subread aligner: fast, accurate and scalable read mapping by seed-and-vote. *Nucleic Acids Res*. 2013;41(10):e108. doi: 10.1093/nar/gkt214. PubMed PMID: 23558742; PubMed Central PMCID: PMC3664803.
3. Love MI, Huber W, Anders S. Moderated estimation of fold change and dispersion for RNA-seq data with DESeq2. *Genome Biol*. 2014;15(12):550. doi: 10.1186/s13059-014-0550-8. PubMed PMID: 25516281; PubMed Central PMCID: PMC34302049.
4. Subramanian A, Tamayo P, Mootha VK, Mukherjee S, Ebert BL, Gillette MA, et al. Gene set enrichment analysis: a knowledge-based approach for interpreting genome-wide expression profiles. *Proc Natl Acad Sci U S A*. 2005;102(43):15545-50. doi: 10.1073/pnas.0506580102. PubMed PMID: 16199517; PubMed Central PMCID: PMC1239896.
